# Supplementary figures and images for: A Rare MSH2 Variant as a Candidate Marker for Lynch Syndrome II Screening in Tunisia: A Case of Diffuse Gastric Carcinoma
Source: MDPI journal article supplement (doi:10.3390/genes13081355), 2022-07-28

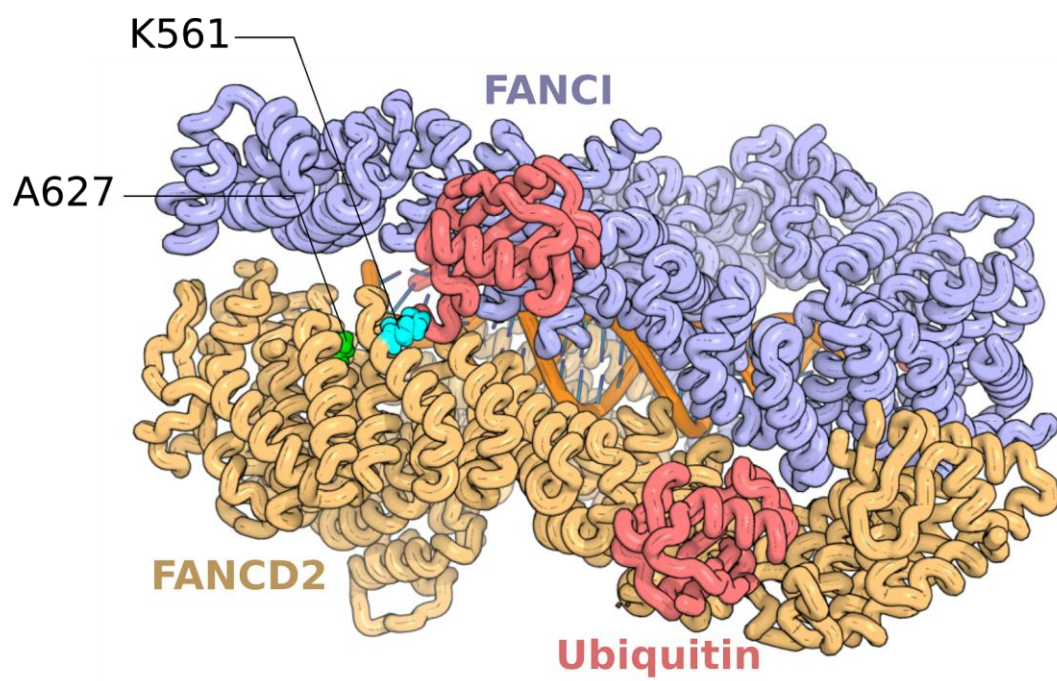

Supplement: s1 [file s1]
